# Supplementary material
Source: Springer Nature journal article supplement (https://www.springermedizin.de/resource/supplementary/13075_2010_9708_MOESM1_ESM.pdf/9693336)

Odds ratios (95% CI)

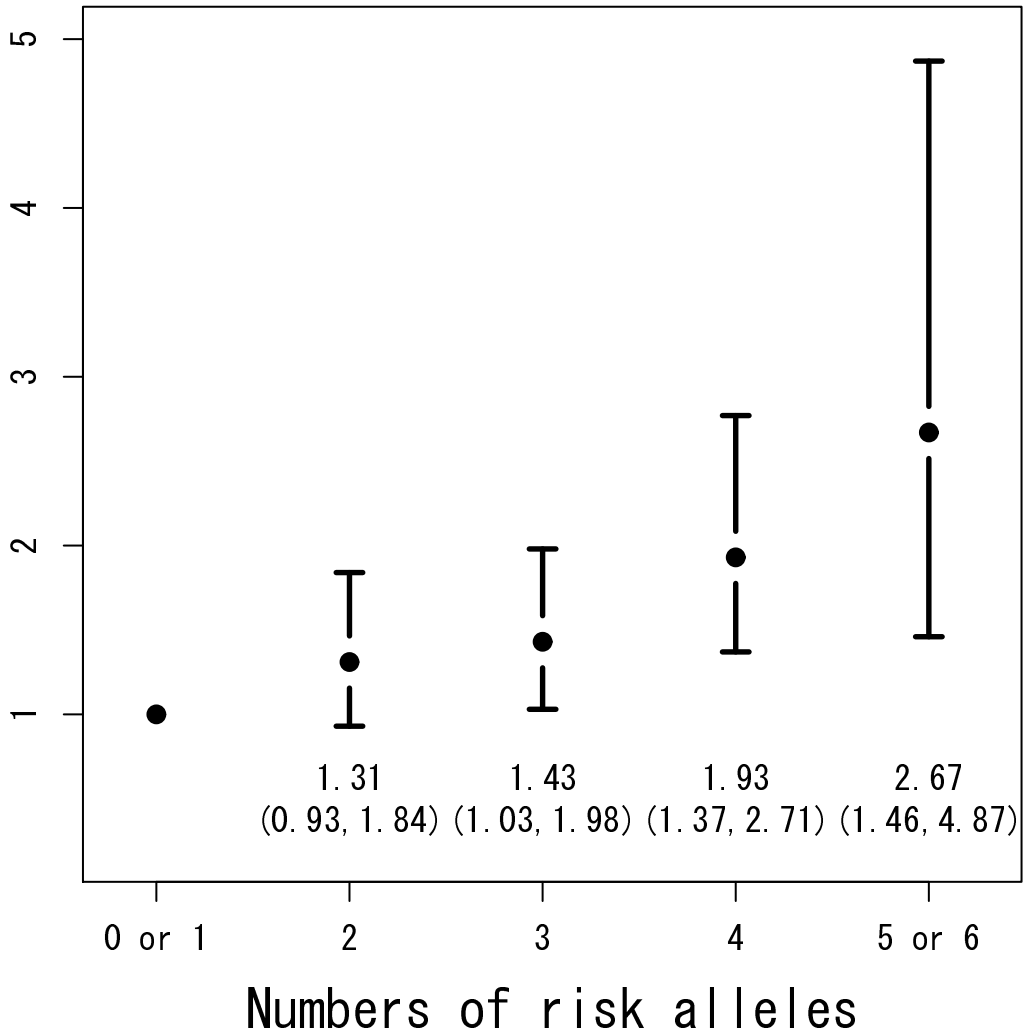

Supplement: MOESM1 [file 9693336]
